# Supplementary material for: Insights from the amphioxus genome on the origin of vertebrate neural crest
Source: HighWire-hosted journal article supplement (doi:10.1101/gr.076208.108), 2008-06-18
Supplement: Yu_Supplemental_0311.pdf [file Yu_Supplemental_0311.pdf]

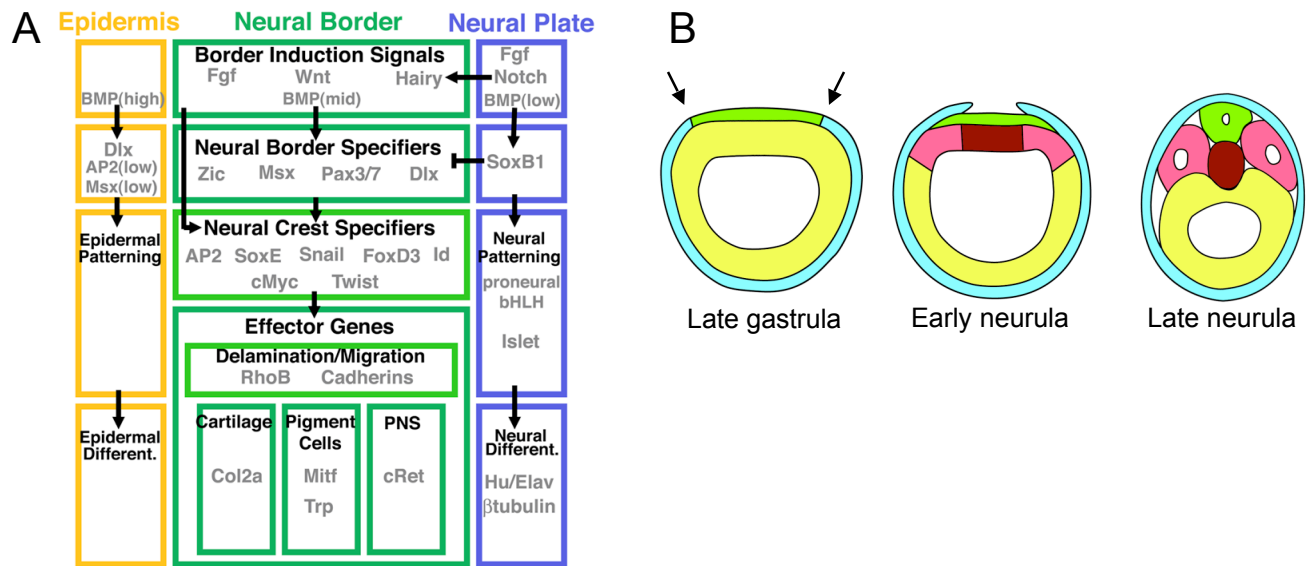

**Figure S1 | A. The neural crest gene network in vertebrates.** Black arrows indicate empirically verified regulatory interactions. In vertebrates, signals from ventral ectoderm and underlying mesendoderm pattern the dorsal ectoderm, inducing expression of neural border specifiers and neural plate markers. These inductive signals then work with neural border specifiers to activate expression of neural crest specifiers. The neural crest specifiers cross-regulate and activate various effector genes, each of which mediates a different aspect of the neural crest phenotype. These include cassettes controlling neural crest delamination and migration as well as differentiation programs for neural crest derivatives like cartilage, pigment cells and peripheral neurons. **B. Cross sections showing neurulation process in amphioxus embryos.** In late gastrula, the embryo is ovoid with presumptive neural plate (green) becoming flattened. The boundaries of presumptive neural plate and epidermis (blue) at this stage are indicated by arrows, and the mesendoderm is colored in yellow. In early neurula, the epidermis (blue) at the edges of the neural plate detaches from the neural plate and begins to overgrow the neural plate, and the somites (pink) and notochord (red) start to form. Eventually the overgrowing dorsal epidermis fuse together at the dorsal midline, and the underneath neural plate curls up to form a dorsal, hollow neural tube in late neurula stage. Now, neurulation is complete, and the rudiment of notochord, anterior somites, as well as the endodermal tube rudiment that will form the pharyngeal tube and gut (yellow) become distinguishable.

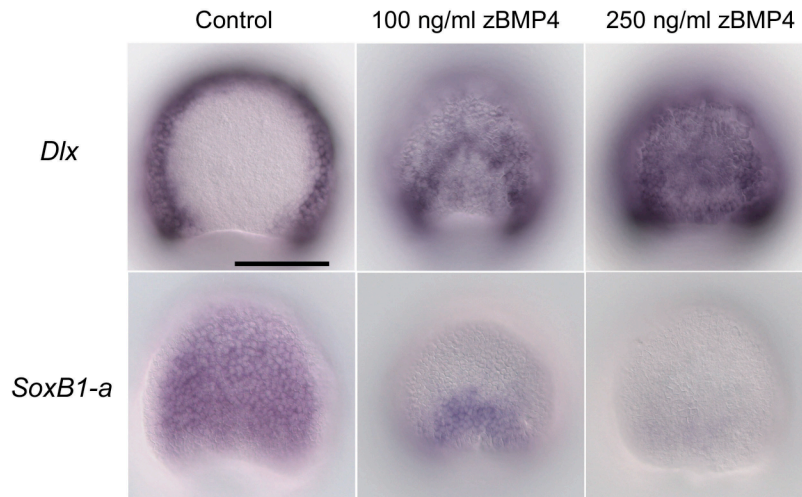

**Figure S2 | Dose-dependent effect of zBMP4 treatment on amphioxus epidermal and neural gene expression.** Whole-mount in situ hybridization for *Dlx* and *SoxB1-a* at late gastrula stage. All embryos are oriented in dorsal view with anterior at the top. Scale bar, 50  $\mu$ m. Expression of epidermal marker *Dlx* was expanded by zBMP4 treatment in a dose-dependant manner; conversely, expression of neural marker *SoxB1-a* was reduced by low concentration of zBMP4 treatment and completely disappeared by high concentration of zBMP4.

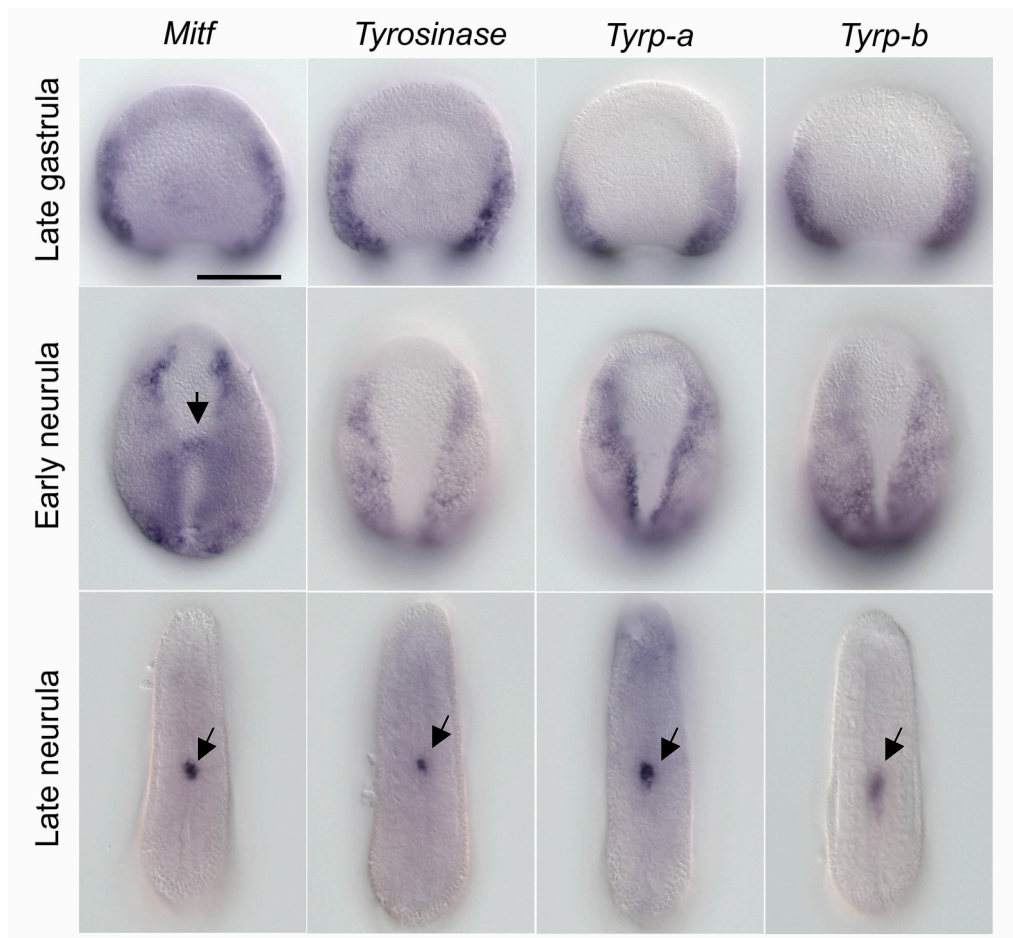

**Figure S3 | Expression of *Mitf*, *Tyrosinase*, and two *Tyrosinase-related proteins* in amphioxus embryos.** All embryos are oriented in dorsal view with anterior at the top. Scale bar, 50  $\mu$ m. All these four genes are co-expressed throughout the epidermal ectoderm in gastrula stage and early neurula stage. During neurula stage, a patch of cells inside the developing neural tube (indicating by arrows) start to expressed these four genes, and the onset of *Mitf* transcription factor gene expression is earlier than the other melanogenic genes.

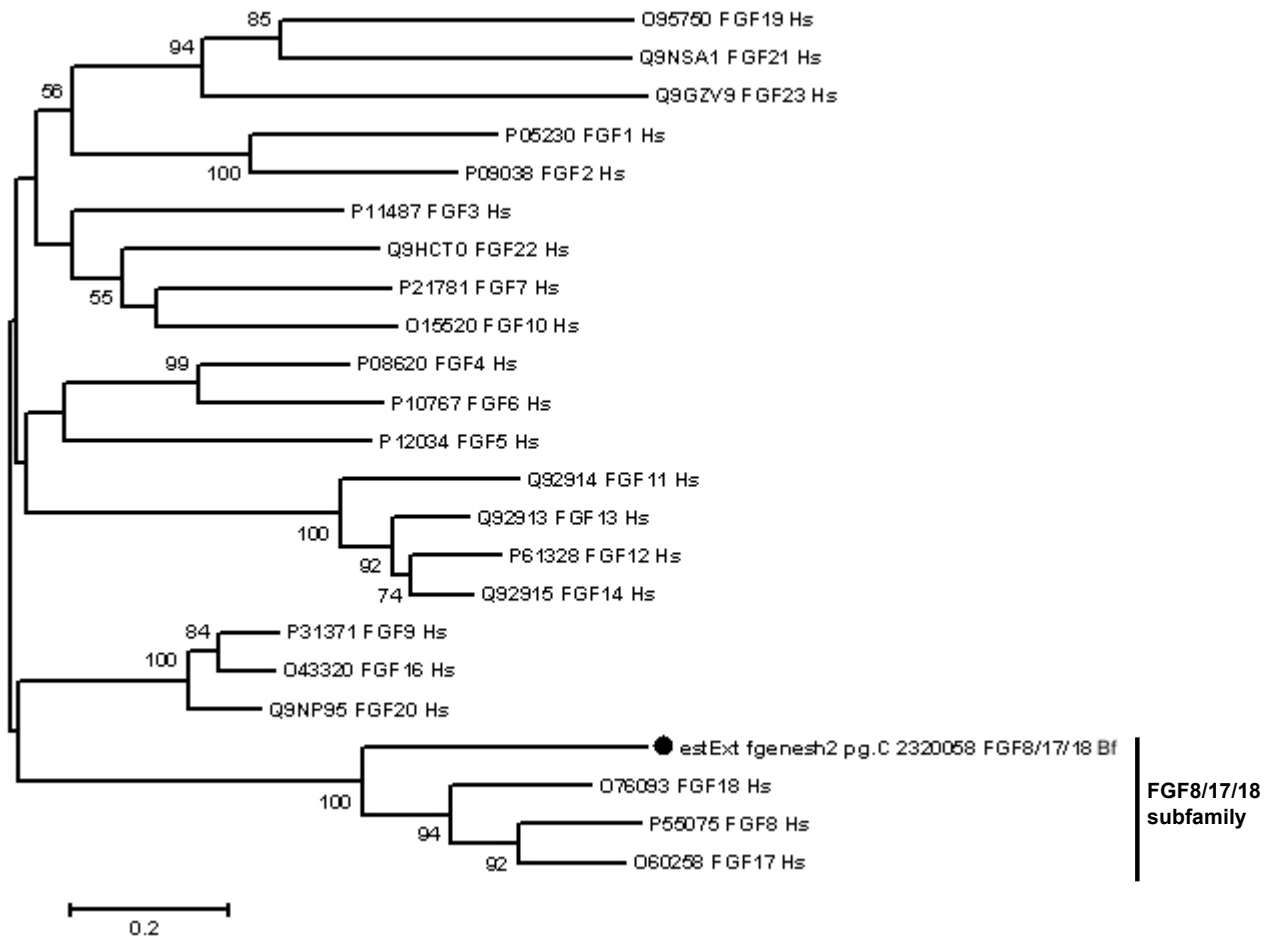

**Figure S4 | Phylogenetic tree of FGF proteins constructed by MEGA program using the neighbor-joining method with default settings.** Amphioxus protein is shown by large black dots. The number matching each branch indicates the percentage of times that a node was supported in 1000 bootstrap pseudoreplications. Protein names are as explained in the Methods. The scale bar indicates an evolutionary distance of 0.2 amino acid substitutions per position. FGF8 has been implicated in playing roles in neural induction and neural crest development. Our survey identified an amphioxus candidate belonging to the FGF8/17/18 subfamily with high bootstrap value of 100%.

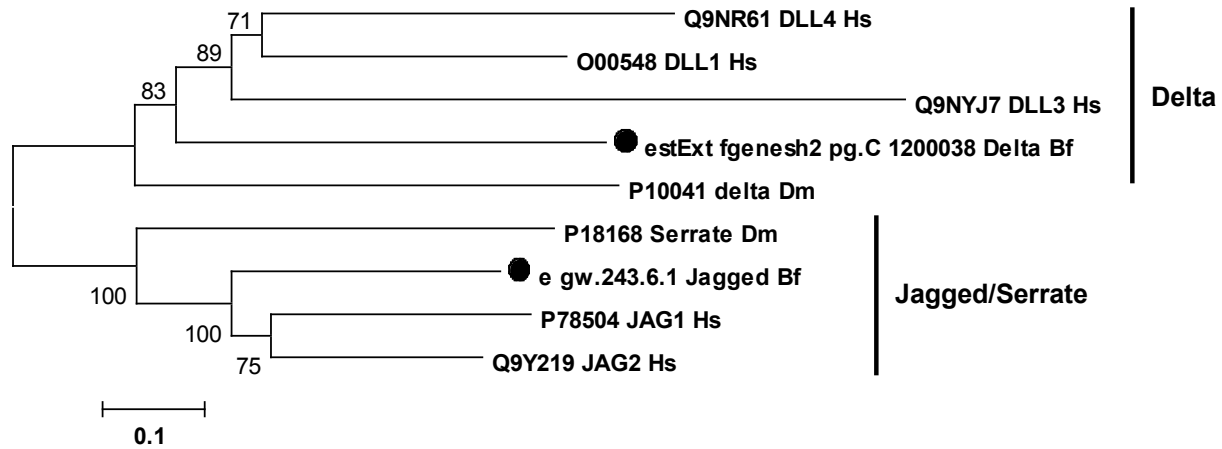

**Figure S5 | Phylogenetic tree of Delta/Jagged/Serrate family proteins generated by MEGA program using the neighbor-joining method with default settings.** Amphioxus proteins are shown by large black dots. The number matching each branch indicates the percentage of times that a node was supported in 1000 bootstrap pseudoreplications. The unrooted tree is shown as a rooted tree for simplicity. Protein names are as explained in the Methods. The scale bar indicates an evolutionary distance of 0.1 amino acid substitutions per position. Delta and Jagged/Serrate proteins are ligands for Notch receptors. Our survey in amphioxus genome identified one candidate gene for Delta and one for Jagged/Serrate. The robust grouping of the tree supports their orthology assignment.

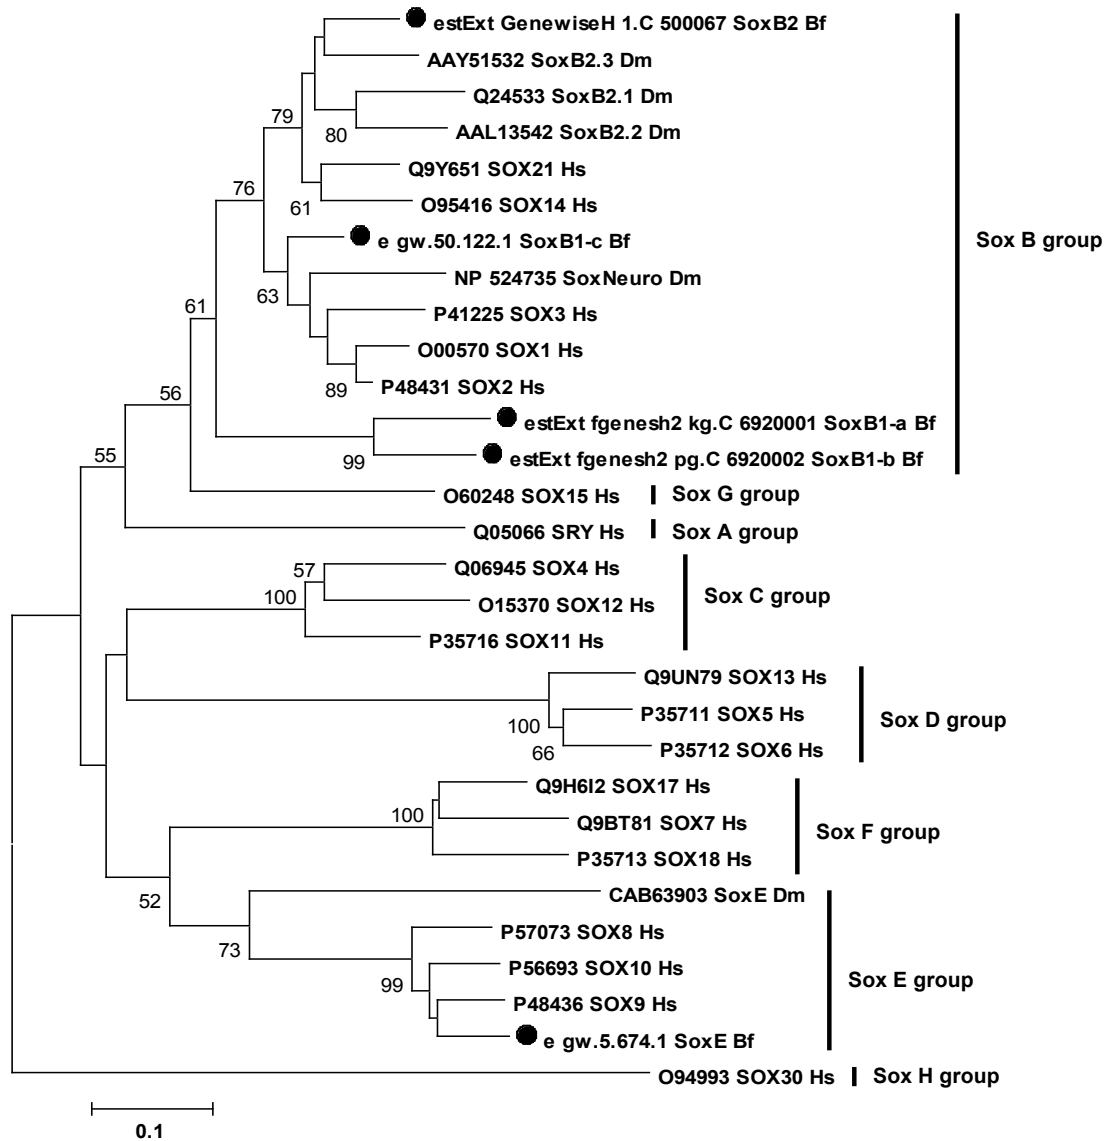

**Figure S6 | Phylogenetic tree of Sox proteins constructed by the neighbor-joining method with default settings.** Amphioxus protein are shown by large black dots. The number matching each branch indicates the percentage of times that a node was supported in 1000 bootstrap pseudoreplications. Protein names are as explained in the Methods. The scale bar indicates an evolutionary distance of 0.1 amino acid substitutions per position. Our survey of amphioxus Sox family genes was focused on the SoxB and Sox E groups. We identified an amphioxus Sox E group candidate which groups with vertebrate Sox E proteins with high bootstrap value(99%). We identified four candidates of amphioxus Sox B members. Although the bootstrap value of Sox B grouping was not very high, we designated the protein names based on the best hit analysis by blast search against a human proteome.

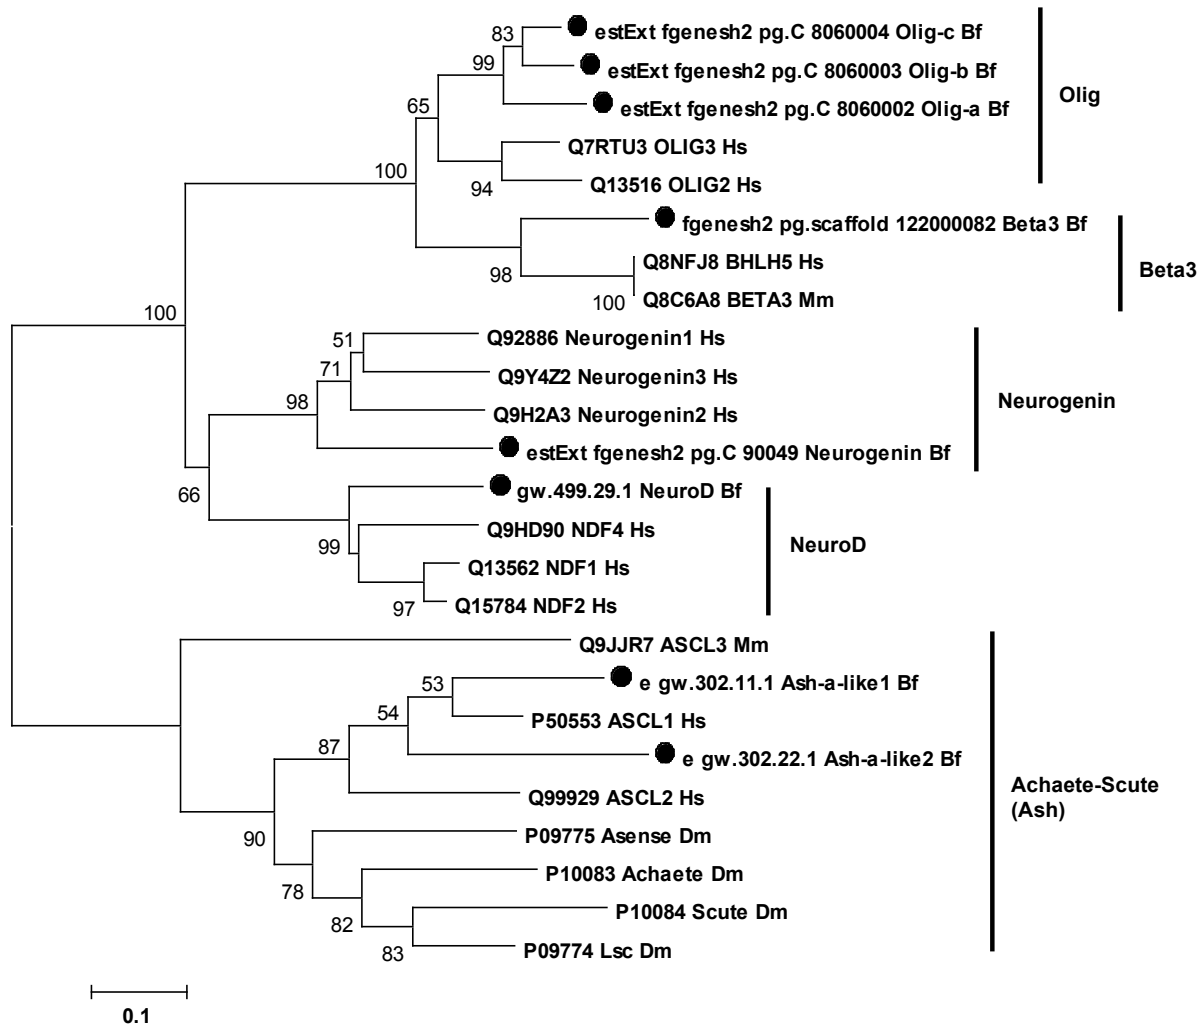

**Figure S7 | Phylogenetic tree of Proneural bHLH factors generated by the neighbor-joining method with default settings.** Amphioxus proteins are shown by large black dots. The number matching each branch indicates the percentage of times that a node was supported in 1000 bootstrap pseudo-replications. Protein names are as explained in the Methods. The scale bar indicates an evolutionary distance of 0.1 amino acid substitutions per position. We identified three possible Olig family orthologues in the amphioxus genome and one candidate for the closely related Beta3 family. The three amphioxus Olig genes are tandemly aligned in the genome within a 62-kb region, suggesting that these genes occurred by amphioxus-specific gene duplications. We also identified amphioxus orthologues of Neurogenin and NeuroD family with strong bootstrap values. There are two possible Ash family members in amphioxus genome, however, the phylogenetic resolution was low within the family. Therefore, we designated these two factors as Ash-a-like1 and Ash-a-like2 based on the best hit analysis.

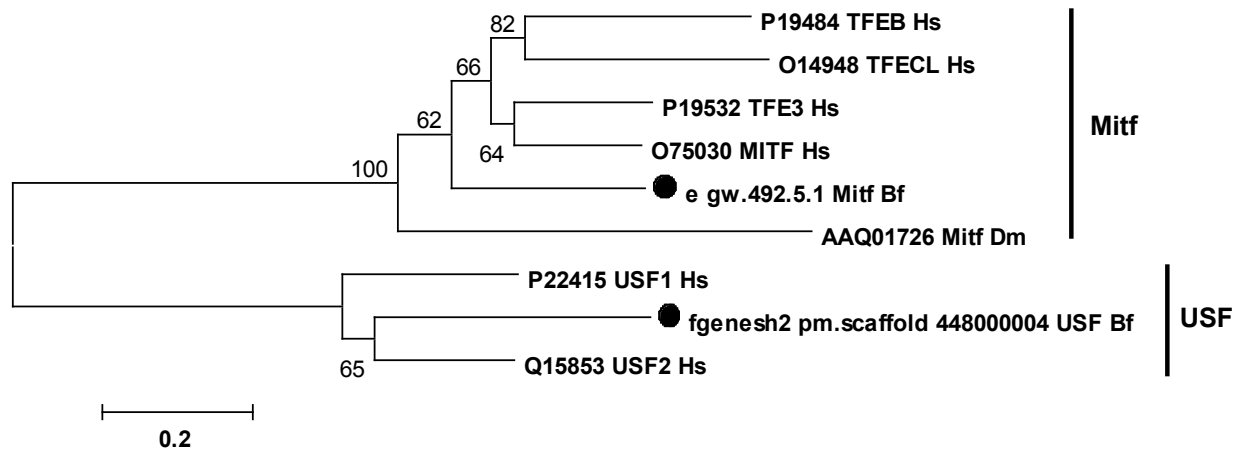

**Figure S8 | Phylogenetic tree of Mitf family proteins generated by MEGA program using the neighbor-joining method with default settings.** Amphioxus proteins are shown by large black dots. The number matching each branch indicates the percentage of times that a node was supported in 1000 bootstrap pseudoreplications. The unrooted tree is shown as a rooted tree for simplicity. Protein names are as explained in the Methods. The scale bar indicates an evolutionary distance of 0.2 amino acid substitutions per position. Our survey in amphioxus genome identified one orthologue of Mitf, and it was included with other Mitf family factors as a clade with high bootstrap support (100%). We also identified a candidate for the USF family member, which is a closely related family to Mitf.



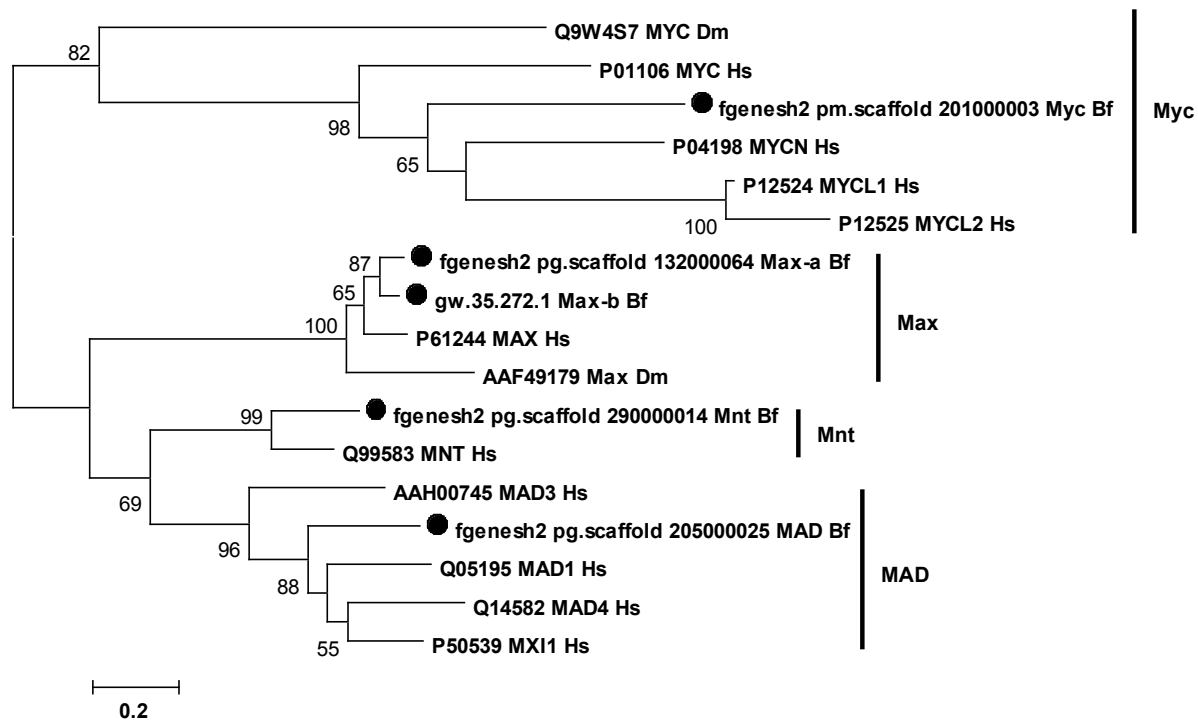

**Figure S9 | Phylogenetic tree of Myc, Max, Mnt, and MAD family proteins generated by the neighbor-joining method with default settings.** Amphioxus proteins are shown by large black dots. The number matching each branch indicates the percentage of times that a node was supported in 1000 bootstrap pseudoreplications. The unrooted tree is shown as a rooted tree for simplicity. Protein names are as explained in the Methods. The scale bar indicates an evolutionary distance of 0.2 amino acid substitutions per position. Our survey in amphioxus genome identified one candidate orthologue of Myc family factor with good bootstrap support (100%). We also identified orthologues of the closely related Max, Mnt, and MAD family members from amphioxus genome. There are two amphioxus Max members and the phylogenetic analysis suggests they occurred by amphioxus-specific duplication.

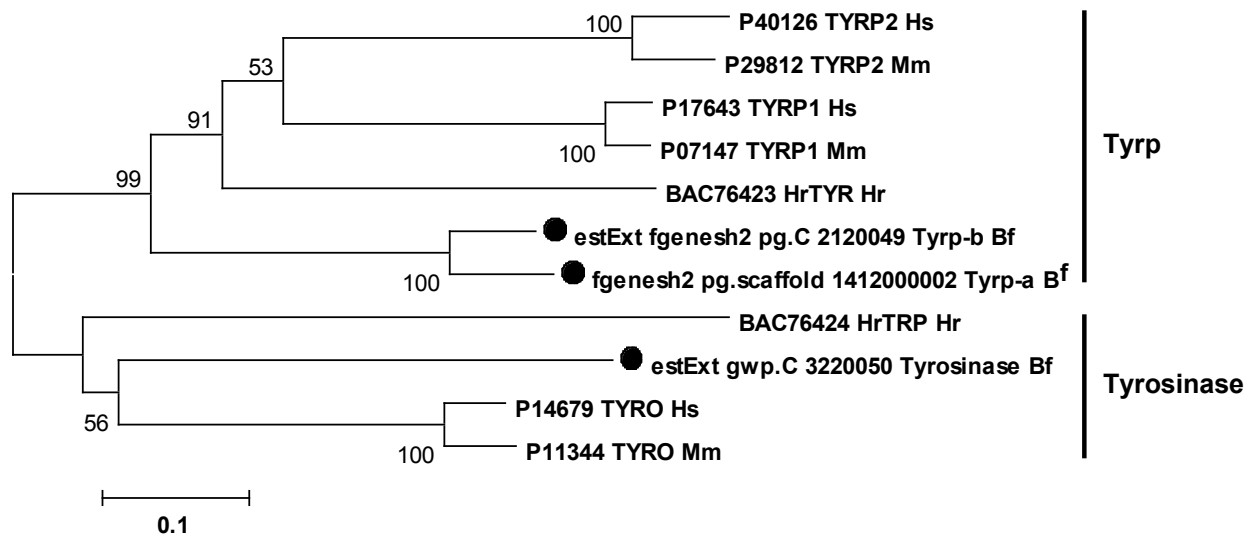

**Figure S10 | Phylogenetic tree of Tyrosinase and Tyrosinase-related proteins (Tyrp)**

**generated by the neighbor-joining method with default settings.** Amphioxus proteins are shown by large black dots. The number matching each branch indicates the percentage of times that a node was supported in 1000 bootstrap pseudoreplications. The unrooted tree is shown as a rooted tree for simplicity. Protein names are as explained in the Methods. The scale bar indicates an evolutionary distance of 0.1 amino acid substitutions per position. Tyrosinase and Tyrosinase-related proteins are separated clearly as two groups in our phylogenetic tree. Our phylogenetic analysis suggests that the two Tyrosinase-related proteins we identified are amphioxus specific duplications, therefore we designated them as Tyrp-a and Tyrp-b.

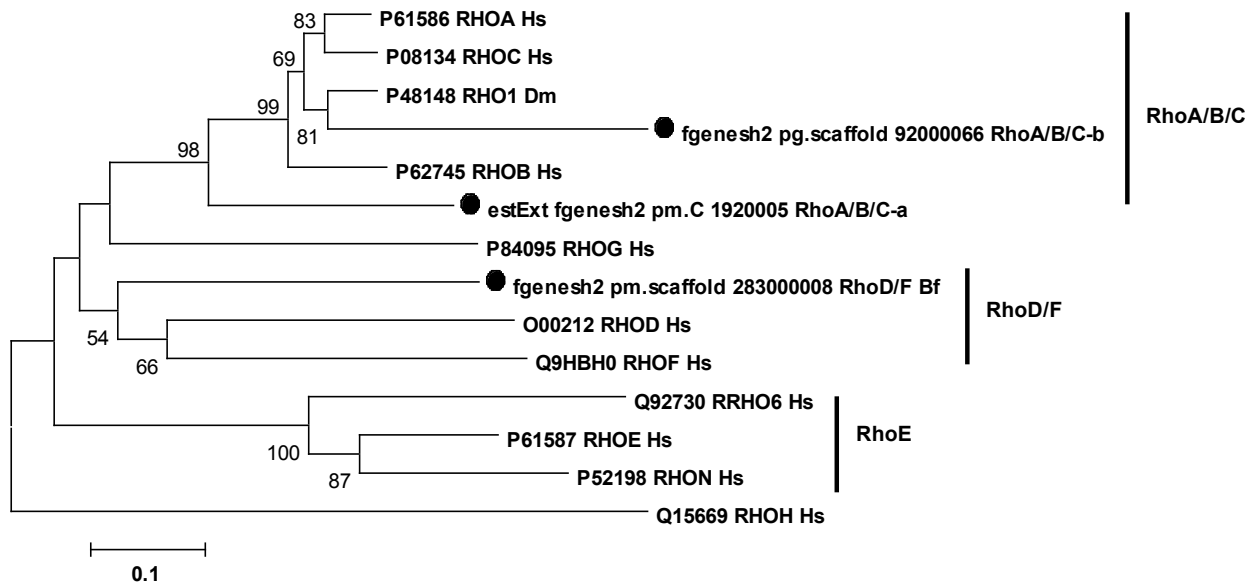

**Figure S11 | Phylogenetic tree of Rho small G-proteins generated by MEGA program using the neighbor-joining method with default settings.** Amphioxus proteins are shown by large black dots. The number matching each branch indicates the percentage of times that a node was supported in 1000 bootstrap pseudoreplications. The unrooted tree is shown as a rooted tree for simplicity. Protein names are as explained in the Methods. The scale bar indicates an evolutionary distance of 0.1 amino acid substitutions per position. We identified two candidate gene models encoding Rho-like G-proteins belonging to the RhoA/B/C group (bootstrap value of 98%). There is also a possible RhoD/F orthologue in amphioxus, however, the bootstrap supporting value is not very high.

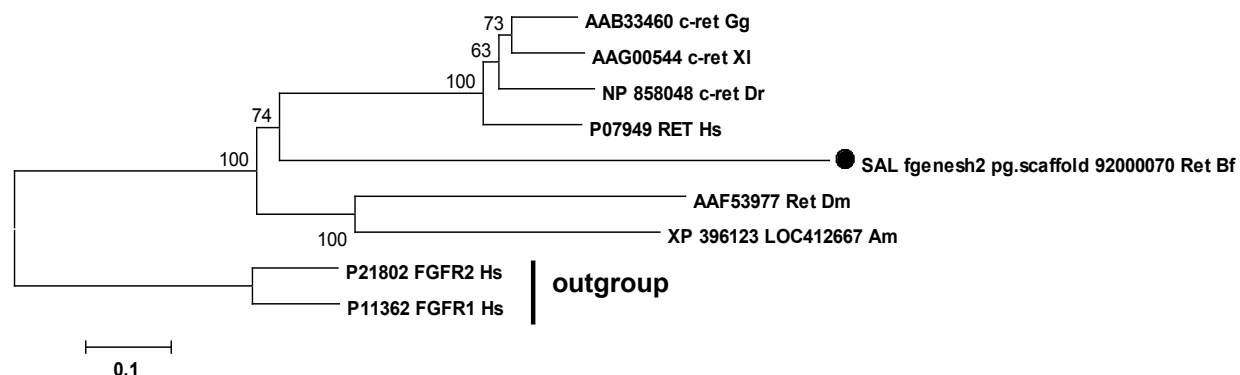

**Figure S12 | Phylogenetic tree of Ret receptor tyrosine kinase proteins generated by the neighbor-joining method based on the alignment of a tyrosine kinase domain.** Amphioxus protein is shown by the large black dot. The number matching each branch indicates the percentage of times that a node was supported in 1000 bootstrap pseudoreplications. Protein names are as explained in the Methods. Human FGF receptors were used as outgroup proteins. The scale bar indicates an evolutionary distance of 0.1 amino acid substitutions per position. Our survey in amphioxus genome identified one candidate belonging to Ret family.

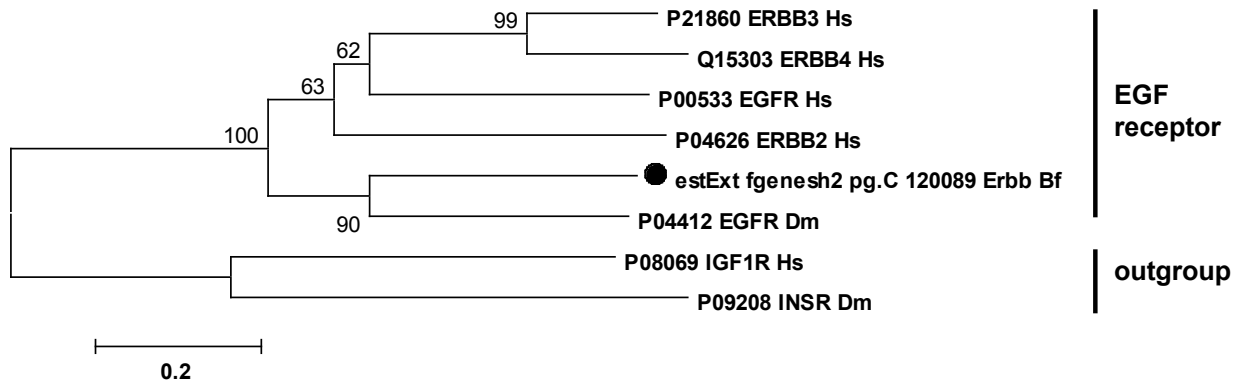

**Figure S13 | Phylogenetic tree of EGF receptors generated by the neighbor-joining method based on the alignment of a tyrosine kinase domain.** Amphioxus protein is shown by large black dots. The number matching each branch indicates the percentage of times that a node was supported in 1000 bootstrap pseudoreplications. Protein names are as explained in the Methods. Human and fly Insulin receptors were used as outgroup proteins. The scale bar indicates an evolutionary distance of 0.2 amino acid substitutions per position. In vertebrates, there are four members of epidermal growth factor (EGF) receptor family of receptor tyrosine kinase including ERBB1 (EGFR), ERBB2, ERBB3 and ERBB4. We identified only one amphioxus Erbb candidate in the genome, and the orthology among this amphioxus protein and EGFRs from other organisms is supported by high bootstrap value of 100%.

**Table S1. Homologues of vertebrate neural crest network genes in the amphioxus *Brachiosoma floridae* genome**

| Gene name                                             | The best hit model in the version 1.0 assembly | The best hit protein in the human proteome    | cDNA clone ID |
|-------------------------------------------------------|------------------------------------------------|-----------------------------------------------|---------------|
| <b><i>Neural plate border induction signals</i></b>   |                                                |                                               |               |
| BMP2/4                                                | estExt_fgenes2_pg.C_3470056                    | P12643 BMP-2                                  | bfga034p10    |
| Wnt1                                                  | estExt_fgenes2_pm.C_120023                     | P04628 WNT-1                                  | bfne123k05    |
| Wnt3                                                  | estExt_fgenes2_pg.C_120044                     | P56704 WNT-3A                                 | bflv058m15    |
| Wnt6                                                  | fgenes2_pm.scaffold_12000022                   | Q9Y6F9 WNT-6                                  | bflv009a17    |
| Wnt7                                                  | fgenes2_kg.scaffold_10000002                   | P56706 WNT-7B                                 | bfne126m18    |
| Wnt8                                                  | fgenes2_kg.scaffold_413000001                  | Q93098 WNT-8B                                 | bfne137b06    |
| FGF8/17/18                                            | estExt_fgenes2_pg.C_2320058                    | O60258 Fibroblast growth factor 17            | bfne018g21    |
| Notch                                                 | estExt_gwp.C_110607                            | Q5SXM3 NOTCH1                                 | bfne093p03    |
| Delta                                                 | estExt_fgenes2_pg.C_1200038                    | O00548 Delta-like 1                           | bfga003d05    |
| <b><i>Neural plate border specifiers</i></b>          |                                                |                                               |               |
| Dlx                                                   | estExt_GenewiseH_1.C_530082                    | P56177 DLX-1                                  | bflv011k11    |
| Msx                                                   | estExt_gwp.C_540071                            | P28360 MSX-1                                  | bflv048l06    |
| Zic (AmphiZic)                                        | estExt_gwp.C_400285                            | Q2M3N1 ZIC1                                   | bfne006l12    |
| Pax3/7                                                | fgenes2_kg.scaffold_211000002                  | Q2PJS5 PAX7                                   | bfne062d03    |
| <b><i>Neural patterning/differentiation genes</i></b> |                                                |                                               |               |
| SoxB1-a *                                             | estExt_fgenes2_kg.C_6920001                    | P48431 SOX-2                                  | bfne037g13    |
| SoxB1-b                                               | estExt_fgenes2_pg.C_6920002                    | P48431 SOX-2                                  | bfne072e07    |
| SoxB1-c                                               | e_gw.50.122.1                                  | P48431 SOX-2                                  | bfne126o15    |
| SoxB2                                                 | estExt_GenewiseH_1.C_500067                    | O95416 SOX-14                                 | bfad048c06    |
| NeuroD                                                | gw.499.29.1                                    | Q13562 Neurogenic differentiation factor 1    | N/A           |
| Neurogenin                                            | estExt_fgenes2_pg.C_90049                      | Q92886 Neurogenin 1                           | N/A           |
| Ash-a-like1                                           | e_gw.302.11.1                                  | P50553 Achaete-scute homolog 1                | N/A           |
| Ash-a-like2                                           | e_gw.302.22.1                                  | P50553 Achaete-scute homolog 1                | N/A           |
| Beta3                                                 | fgenes2_pg.scaffold_122000082                  | Q8NFJ8 Basic helix-loop-helix protein 5       | N/A           |
| Olig-a                                                | estExt_fgenes2_pg.C_8060002                    | Q7RTU3 Oligodendrocyte transcription factor 3 | bfne042a07    |
| Olig-b                                                | estExt_fgenes2_pg.C_8060003                    | Q7RTU3 Oligodendrocyte transcription factor 3 | bfne044b12    |
| Olig-c                                                | estExt_fgenes2_pg.C_8060004                    | Q7RTU3 Oligodendrocyte transcription factor 3 | bfne004n21    |
| Islet                                                 | estExt_fgenes2_kg.C_1460001                    | P61371 Islet-1                                | bfne013h18    |
| Hu/elav                                               | fgenes2_pg.scaffold_219000066                  | Q12926 ELAV-like protein 2                    | bflv027g23    |

---

**Neural crest specifiers**

|       |                               |                                   |            |
|-------|-------------------------------|-----------------------------------|------------|
| Snail | estExt_fgenes2_kg.C_190001    | O43623 Zinc finger protein SLUG   | bfne095n03 |
| FoxD  | estExt_fgenes2_kg.C_2440002   | Q9UJU5 FOXD3                      | bfne002k18 |
| Twist | fgenes2_pm.scaffold_217000008 | Q8WVJ9 Twist-related protein 2    | bfne115j15 |
| Myc   | fgenes2_pm.scaffold_201000003 | P01106 Myc proto-oncogene protein | bfne011k03 |
| Id    | fgenes2_pg.scaffold_166000081 | Q02363 ID-2                       | bfne018j05 |
| AP-2  | e_gw.327.57.1                 | P05549 AP-2 alpha                 | bfne111f20 |
| SoxE  | e_gw.5.674.1                  | P48436 SOX-9                      | bfne111n21 |

**Neural crest effector genes**

|                   |                                               |                                           |            |
|-------------------|-----------------------------------------------|-------------------------------------------|------------|
| Mitf              | e_gw.492.5.1                                  | O75030 MITF                               | bfiv016p23 |
| Tyrosinase        | estExt_gwp.C_3220050                          | P14679 Tyrosinase                         | bfga039h23 |
| Tyrp1             | fgenes2_pg.scaffold_1412000002                | P17643 TRP-1                              | bfga030e07 |
| Tyrp2             | estExt_fgenes2_pg.C_2120049                   | P40126 L-dopachrome tautomerase precursor | bfga006j06 |
| RhoA/B/C-a        | estExt_fgenes2_pm.C_1920005                   | P61586 RHOA                               | bfga002n08 |
| RhoA/B/C-b        | fgenes2_pg.scaffold_92000066                  | P61586 RHOA                               | bfne019m11 |
| Ret               | SAL_fgenes2_pg.scaffold_92000070 <sup>†</sup> | P07949 RET                                | N/A        |
| ErbB              | estExt_fgenes2_pg.C_120089                    | P21860 ErbB-3                             | N/A        |
| Col2a             | fgenes2_pg.scaffold_53000100                  | P02458 alpha 1 type II collagen           | bfiv014e16 |
| cKit              | Not found                                     |                                           |            |
| Myelin protein P0 | Not found                                     |                                           |            |

---

N/A: not available

\* This gene was named AmphiSox1/2/3 in previous literatures

<sup>†</sup> This gene model was annotated manually by combining two predicted gene models fgenes2\_pg.scaffold\_92000069 and fgenes2\_pg.scaffold\_92000070.

**Table S2.** Expression of EGFP in chick embryos electroporated at stage 3+ to 4.

| Stage examined | Somites/paraxial<br>mesoderm | Notochord | Neural tube<br>(hindbrain) | Head<br>mesenchyme |
|----------------|------------------------------|-----------|----------------------------|--------------------|
| Stage 8 (n=4)  | 4/4                          | 4/4       | 0/4                        | 4/4                |
| Stage 10 (n=5) | 5/5                          | 3/5*      | 5/5                        | 4/5**              |
| Stage 11 (n=4) | 4/4                          | 4/4       | 4/4                        | 4/4                |

\* The two embryos with no EGFP in the notochord did not show any expression of RFP in the notochord.

\*\* The embryo with no EGFP expression in the head mesenchyme did not show any expression of RFP in the head mesenchyme.
